# Supplementary material
Source: publisher site journal article supplement (https://www.spandidos-publications.com/2632/downloadSupplementary)
Supplement: Supplementary file 1 [file downloadSupplementary]

## Sheet: Table S8 Up_GO_enrichment_P
Table SVIII. Up_GO_enrichment_P.
#Term	Database	ID	Input number	Background number	P-value	Corrected P-value	Input	Hyperlink
positive regulation of transcription from RNA polymerase II promoter	Gene Ontology	GO:0045944	10	749	7.83611e-07	4.70167e-06	STAT4|ANKRD1|DDX41|TBX20|FOXD2|SP7|GLI1|PAX9|ISL1|SOX6	http://amigo.geneontology.org/cgi-bin/amigo/term_details?term=GO:0045944
nervous system development	Gene Ontology	GO:0007399	6	278	1.29349e-05	3.88048e-05	PCDHA1|SEMA3D|APBA2|DCLK1|PCDHB12|FGF5	http://amigo.geneontology.org/cgi-bin/amigo/term_details?term=GO:0007399
transcription, DNA-dependent	Gene Ontology	GO:0006351	12	1857	8.72794e-05	0.000174559	STAT4|FHIT|ZNF735|BACH2|SOX6|ZFP2|SP7|TCF24|ZNF14|ZNF460|PAX9|ZNF77	http://amigo.geneontology.org/cgi-bin/amigo/term_details?term=GO:0006351
protein phosphorylation	Gene Ontology	GO:0006468	5	344	0.000470758	0.000638854	TSSK6|STAT4|DCLK1|ROS1|SGK2	http://amigo.geneontology.org/cgi-bin/amigo/term_details?term=GO:0006468
regulation of transcription, DNA-dependent	Gene Ontology	GO:0006355	9	1305	0.000570569	0.000638854	FHIT|ZNF735|ZFP2|TCF24|ZNF14|ZNF460|SOX6|ZNF77|TAF7L	http://amigo.geneontology.org/cgi-bin/amigo/term_details?term=GO:0006355
negative regulation of transcription from RNA polymerase II promoter	Gene Ontology	GO:0000122	6	565	0.000638854	0.000638854	ANKRD1|TBX20|FOXD2|ISL1|MSX2|SOX6	http://amigo.geneontology.org/cgi-bin/amigo/term_details?term=GO:0000122
